# Supplementary material
Source: PubMed Central journal article supplement (PMC1889999)
Supplement: bmj_334_7605_1211__1.pdf [file bmj_334_7605_1211__1.pdf]

## Supplementary References [Posted as supplied by the author]

w1 de Jong MD, Weel JF, van Oers MH, Boom R, Wertheim-van Dillen PM.

Molecular diagnosis of visceral herpes zoster. *Lancet* 2001;357:2101-02

w2 L He, D Zhang, M Zhou, C Zhu. Corticosteroids for preventing postherpetic neuralgia. *The Cochrane Database of Systematic Reviews* 2006;1

w3 Saarto T, Wiffen PJ. Antidepressants for neuropathic pain. *Cochrane Database of Systematic Reviews* 2005;3

w4 Cobo L, Foulkes G, Lisegang T. Oral acyclovir in the treatment of acute herpes zoster ophthalmicus. *Ophthalmology* 1986;93:763-70

w5 Dubinsky RM, Kabbani H, El-Chami Z, Boutwell C, Ali H. Practice Parameter: Treatment of postherpetic neuralgia: An evidence-based report of the Quality Standards Subcommittee of the American Academy of Neurology. *Neurology* 2004;63:959-65

w6 Watson CP, Evans RJ, Reed K, Merskey H, Goldsmith L, Warsh J.

Amitriptyline versus placebo in postherpetic neuralgia. *Neurology* 1982;32:671-3

w7 Max MB, Schafer SC, Culnane M, Smoller B, Dubner R, Gracely RH.

Amitriptyline, but not lorazepam, relieves postherpetic neuralgia. *Neurology* 1988;38:1427-32

w8 Watson CP, Vernich L, Chipman M, Reed K. Nortriptyline versus amitriptyline in postherpetic neuralgia: a randomised trial. *Neurology* 1998;51:1166-71

w9 Watson CP, Chipman M, Reed K, Evans RJ, Birkett N. Amitriptyline versus maprotiline in postherpetic neuralgia: a randomised, double-blind, crossover trial. *Pain* 1992;48:29-36

w10 Kishore-Kumar R, Max MB, Schafer SC, Gaughan AM, Smoller B, Gracely RH et al. Desipramine relieves postherpetic neuralgia. *Clin Pharmacol Ther* 1990;47:305-12

w11 Rowbotham M, Harden N, Stacey B, Bernstein P, Magnus-Miller L. Gabapentin for the treatment of postherpetic neuralgia: a randomised controlled trial. *JAMA* 1998;220:1837-42

w12 Rice ACS, Maton S. Gabapentin in postherpetic neuralgia: a randomised, double blind, placebo controlled study. *Pain* 2001;94:215-224

w13 Dworkin RH, Corbin AE, Young JP Jr, Sharma U, LaMoreaux L, Bockbrader H et al. Pregabalin for the treatment of postherpetic neuralgia: a randomised, placebo-controlled trial. *Neurology* 2003;60:1274-83

w14 Watson CP, Babul N. Efficacy of oxycodone in neuropathic pain: a randomised trial in postherpetic neuralgia. *Neurology* 1998;50:1837-41

w15 Raja SN, Haythornthwaite JA, Pappagallo M, Clark MR, Trivison TG, Sabeen S et al. Opioids versus antidepressants in postherpetic neuralgia: a randomised, placebo-controlled trial. *Neurology* 2002;59:1015-21

w16 Boureau F, Lagallicier P, Kabir-Ahmadi M. Tramadol in post-herpetic neuralgia: a randomised, double-blind, placebo-controlled trial. *Pain* 2003;104:323-31

w17 Rowbotham MC, Davies PS, Fields HL. Topical lidocaine gel relieves postherpetic neuralgia. *Ann Neurol* 1995;37:246-253

w18 Galer BS, Rowbotham MC, Perander J, Friedman E. Topical lidocaine patch relieves postherpetic neuralgia more effectively than a vehicle topical patch:

results of an enriched enrolment study. *Pain* 1999;80:533-8

w19 De Benedittis G, Lorenzetti A. Topical aspirin/diethyl ether mixture versus indomethacin and diclofenac/diethyl ether mixtures for acute herpetic neuralgia and postherpetic neuralgia: a double-blind crossover placebo-controlled study.

*Pain* 1996;65:45-51

w20 Watson CP, Tyler KL, Bickers DR, Millikan LE, Smith S, Coleman E. A randomised vehicle-controlled trial of topical capsaicin in the treatment of

postherpetic neuralgia. *Clin Ther* 1993;15:510-26
